# Supplementary material for: Design and Testing of Dual-Targeted Gd3N@C80-Containing Glioblastoma Theranostics
Source: Hindawi journal article supplement (doi:10.1155/2019/1242930), 2019-03-03
Supplement: f1 [file 1242930.f1.zip]

Archive with 2 entries (2 files):
- suppl 1242930.pdf
- Supplementary Information 1-Browinian Motion Liposomes.mp4
